1 Full title: “Running with cancer”: a qualitative study to evaluate barriers and motivations  
2 in running for female oncological patients.

3

4 Short title: Barriers and motivations in running for female oncological patients.

5

6 Alice Avancini<sup>1\*</sup>, Kristina Skroce<sup>2</sup>, Daniela Tregnago<sup>3</sup>, Paolo Frada<sup>2</sup>, Ilaria Trestini<sup>3</sup>, Maria Cecilia  
7 Cercato<sup>4</sup>, Clelia Bonaiuto<sup>3</sup>, Cantor Tarperi<sup>2,5</sup>, Federico Schena<sup>2</sup>, Michele Milella<sup>3</sup>, Sara Pilotto<sup>3</sup>,  
8 Massimo Lanza<sup>2</sup>

9

10 <sup>1</sup> Biomedical, Clinical and Experimental Sciences, Department of Medicine, University of Verona  
11 Hospital Trust, Verona, Italy.

12 <sup>2</sup> Department of Neurosciences, Biomedicine and Movement Sciences, University of Verona, Verona,  
13 Italy.

14 <sup>3</sup> Department of Oncology, University of Verona Hospital Trust, Verona, Italy.

15 <sup>4</sup> Epidemiology and Cancer Registry Unit, Regina Elena National Cancer Institute, IRCCS, Rome,  
16 Italy.

17 <sup>5</sup> Department of Clinical and Biological Sciences, University of Turin, Turin, Italy.

18

19 \* Corresponding author

20 E-mail: [alice.avancini@univr.it](mailto:alice.avancini@univr.it) (AA)

21

22

## 23 **Abstract**

24 Nowadays, it is widely acknowledged that low physical activity levels are associated with an increase  
25 in terms of both disease recurrence and mortality in cancer survivors. In this light, deciphering those  
26 factors able to hamper or facilitate an active lifestyle is crucial in order to increase patients' adherence  
27 to physical activity. The purpose of this study was to explore barriers and motivations in a sample of  
28 female oncological patients, practising running using the ecological model and compare them with  
29 healthy controls. Focus group interviews were conducted at Verona University. Participants were 12  
30 female cancer survivors and 7 matched healthy controls who had participated at "Run for Science"  
31 project. The interviews were transcribed verbatim and analyzed using content analysis. Two main  
32 themes, motivations and barriers were found. About motivations, three sub-themes were identified:  
33 *personal, interpersonal and environmental/organizational factors*. Regarding barriers, another sub-  
34 theme was recognized: *community/policy factors*. Compare to healthy controls, survivors expressed  
35 motivations and barriers specifically related to their oncological disease. Running was a challenge with  
36 their cancer and a hope to give to other patients. Main barriers were represented by treatment-related  
37 side effects, inexperienced trainers and external factors, e.g. delivery of incorrect information. Running  
38 program dedicated to oncological patients should consider intrinsic obstacles, related to cancer and its  
39 treatment, offering a personalized intervention performed by qualified trainers, together with a  
40 motivational approach able to improve participants' adherence to an active lifestyle.

41

42

## 43 **Introduction**

44 In Italy, one out of three women will experience an oncological disease during lifetime (1). Cancer is  
45 the second most common chronic disease in female population and in 2018 there were 1.837.412  
46 cancer-diagnosed woman in Italy (1). The introduction in clinical practice of innovative treatments  
47 have allowed cancer survivors to achieve an improved prognosis and quality of life. Nevertheless,  
48 cancer patients often experience important treatment-related side effects, involving both the physical  
49 and psychological spheres, having a potential prolonged impact on patients' condition even after  
50 therapy conclusion (2).

51 An increasing amount of studies has demonstrated that physical activity (PA) and exercise (EX) are  
52 safe and feasible in the oncological setting. PA can support standard therapies, helping cancer survivors  
53 in reducing their risk of recurrence and mortality (3). PA and EX can facilitate the management of  
54 some disease- and treatment-related effects, as fatigue, nausea and vomiting, increasing patients'  
55 quality of life (4, 5). Moreover, the EX and PA benefits include improvement in cardiorespiratory  
56 fitness, strength, flexibility and body composition (6, 7). The American College of Sport Medicine  
57 recommends patients with cancer to avoid inactivity and engage in at least 90 min/week of moderate-  
58 intensity aerobic PA, with strength EX two times per week (2).

59 One of the most common type of aerobic PA is running, not only for its physical and physiological  
60 benefits, but also for its accessibility and simplicity. A recent report indicated that there were 17.1  
61 million running participants during the 2015 running season (8). Running is the most widespread PA  
62 also in cancer setting with an acknowledged beneficial impact (8). Running confers numerous  
63 cardiovascular, metabolic, musculoskeletal and neuropsychiatric benefits and is strongly associated  
64 with lower body weight and smaller waist circumference (8). This PA is shown to increase life-  
65 longevity and is often recommended as prevention and control for various chronic diseases, including

66 cancer. Previous studies have identified different factors related to running motivation, as the desire to  
67 affiliate with other runners, an increase in self-esteem, physical motives for general health benefits,  
68 improving quality of life, coping with negative emotions and many more (9). Despite many positive  
69 aspects connected with a more active lifestyle, there are many barriers that can interfere with EX  
70 adherence, particularly speaking about running, which may be more physically and psychologically  
71 difficult than some other activities (10).

72 These motivations and barriers are connected not only with the momentary health status, but also with  
73 the previous health-related experiences. Furthermore, individual behaviour may be influenced by many  
74 elements that interact with the person (11) (12). This approach, also called *Ecological model* assumes  
75 that individual competencies, intrapersonal relations, organisational or community structures and  
76 political choices can influence or determine the individual's behaviour (11) in many fields, including  
77 physical activity and lifestyle. To date, no study investigated barriers and motivations in female cancer  
78 survivors that approaching running and compared them with their healthy controls. Therefore, the aim  
79 of this study was to qualitatively investigate barriers and motivations, according to the ecological  
80 model, in a sample of female cancer survivors practising running and compare them with healthy  
81 controls.

82

## 83 **Materials and methods**

84

### 85 **Design**

86 We conducted a series of focus group sessions among female adults affected or not by cancer to  
87 qualitatively assess barriers and motivations towards running.

88 The study was approved by the local Ethical Committee (Department of Neurological,  
89 Neuropsychological, Morphological and Movement Science, University of Verona, Prot. No. 165038)  
90 and followed to Standards for Reporting Qualitative Research (SRQR) guidelines for qualitative  
91 research (13, 14).

92

## 93 **Participants and recruitment**

94 A purposive sample was employed to recruit women who had participated at “Run for Science” (R4S)  
95 project(15). Inclusion criteria for the experimental group (oncological group – OG) were: female  
96 participant, had been diagnosed with cancer, being  $\geq 18$  years of age and participating in R4S event.  
97 Regarding healthy controls (control group – CG), women participating at R4S, with absence of chronic  
98 disease and aged major than 18 aged were considered eligible. The inclusion criteria were assessed by  
99 AA through the database of R4S.  
100 Eligible women were contacted individually via email by the research team to introduce them the  
101 study. If they agreed to participate, AA contacted them by telephone to organize the interview.  
102 Informed consent was obtained from included participants the day of the interviews, before starting the  
103 focus group. To protect participants’ identity pseudonyms were used to report the data.

104

## 105 **The “Run for Science” project**

106 The R4S, previously described (16), is a research project endorsed by the University of Verona, which  
107 involve Italian, European and American scientific institutions. The purpose of this event, coordinated  
108 by FS, CT, and KS, is to investigate several aspects regarding the effects of endurance running, and  
109 usually involves more than 200 volunteer runners every year.

110

## 111 **Data collection**

112 Focus groups were held, from April 2019-July 2019, in a meeting room at Department of  
113 Neuroscience, Biomedicine and Movement of Verona University and lasted approximately 60 minutes.  
114 Interviews were conducted separately for the groups of women with a cancer diagnosis and the groups  
115 of healthy subjects. The reason for this choice was to make a more possible comfortable environment  
116 to bring out detailed information regarding own personal history.  
117 The interviews were carried out by ML and observed by AA and PF. ML is Associate Professor in  
118 Sport Science and Methodology at Verona University with expertise in PA and health promotion. AA  
119 was a PhD student involved in EX in oncological patients, with previous interview experience and PF  
120 was a master's degree student in preventive and adapted PA. Participants were asked about barriers and  
121 motivators to running, applying the ecological model. The first and the last author developed some  
122 semi-structured questions, based on previous studies (17, 18) to guide the interviews (Table 1). The  
123 interview guide was reviewed by DT, the dedicated psycho-oncologist working at Oncology  
124 Department of Verona University Hospital. All interviews were audio-recorded and transcribed  
125 verbatim. Data collection continued until saturation principle was reached, i.e. no new information  
126 seemed to emerge from the interviews.  
127 After each focus group session, a questionnaire to investigate the socio-demographic data (e.g. birth  
128 date, education level, marital status, occupational status and perceived economic insecurity) and  
129 clinical information (medical history) was proposed.

130

131 **Table 1.** Semi-structured interview questions

---

*Motivations*

---

- 
- From the personal point of view (thinking of physical and psychological state and previous experience) is there any factor that in your opinion may motivate the adherence to running program?
  - From the social point of view (thinking of relationships with other people, friends, colleagues, family) is there any factor that in your opinion may motivate the adherence to running program?
  - From the environmental point of view (thinking of place, organizations and institutions) is there any factor that in your opinion may motivate the adherence to running program?
  - From the cultural point of view (thinking of politics and national/regional rules) is there any factor that in your opinion may motivate the adherence to running program?
- 

### *Barriers*

- From the personal point of view (thinking of physical and psychological state and previous experience) is there any factor that in your opinion may limit the adherence to running program?
  - From the social point of view (thinking of relationships with other people, friends, colleagues, family) is there any factor that in your opinion may limit the adherence to running program?
  - From the environmental point of view (thinking of place, organizations and institutions) is there any factor that in your opinion may limit the adherence to running program?
  - From the cultural point of view (thinking of politics and national/regional rules) is there any factor that in your opinion may limit the adherence to running program?
- 

132

## 133 **Analysis**

134 ML, AA and PF independently analysed the data, using the content analysis. This approach was  
135 performed with Atlas.ti<sup>TM</sup> software and involved a process of reading, reflection, decoding and re-  
136 reading on the meaning of the data collected, in order to analytically interpret the text. First, the text  
137 was read several times to identify recurring ideas and to get a sense of the whole discussion. The  
138 second point included the formulation of codes summarizing the salient features of collected data. The

139 third, was grouping the code into themes and eventually sub-themes. The final step involved all three  
140 authors with a process called *triangulation*. This consisted in presenting the emerged findings to the  
141 research team members, comparing the results, identifying differences and defining the final themes  
142 (19).

143

## 144 Results

145 All the invited cancer survivors participated to the study, while 7 out of 13 healthy females completed  
146 the focus group. Table 2 illustrates the socio-demographic and medical characteristics of both groups.  
147 The performed analysis identified two main themes: 1) motivations and 2) barriers in running.

148 **Table 2.** Participant' characteristics.

|                                          | <i>Experimental group<br/>(n=12)</i> | <i>Control group (n=7)</i> |
|------------------------------------------|--------------------------------------|----------------------------|
| Age <sup>a</sup> , mean (SD)             | 50,5 (5,9)                           | 47,5 (8,0)                 |
| Body mass index <sup>b</sup> , mean (SD) | 21,9 (2,8)                           | 22,1 (0,8)                 |
| Education, N                             |                                      |                            |
| Secondary                                | 1                                    | 0                          |
| High school degree                       | 7                                    | 4                          |
| Undergraduate degree                     | 3                                    | 2                          |
| Postgraduate degree                      | 1                                    | 1                          |
| Marital status, N                        |                                      |                            |
| Unmarried                                | 4                                    | 3                          |
| Married                                  | 7                                    | 4                          |
| Divorced                                 | 1                                    | 0                          |
| Employment, N                            |                                      |                            |
| Part time employed                       | 8                                    | 3                          |
| Full time employed                       | 4                                    | 4                          |
| Family income, N                         |                                      |                            |
| Many difficulties                        | 1                                    | 0                          |
| Some difficulties                        | 4                                    | 1                          |
| Easily                                   | 4                                    | 5                          |
| Very easily                              | 3                                    | 1                          |



|                                          |                 |                 |
|------------------------------------------|-----------------|-----------------|
| METs - Physical activity, mean (SD)      | 3069,9 (1536,5) | 2441,3 (1119,1) |
| Tumor site, N                            |                 |                 |
| Colorectal                               | 2               | -               |
| Hematologic                              | 1               | -               |
| Breast                                   | 9               | -               |
| Stage, N                                 |                 |                 |
| Unknown                                  | 5               | -               |
| Early                                    | 4               | -               |
| Advanced                                 | 3               | -               |
| Metastatic                               | 0               | -               |
| Months from diagnosis, mean (SD)         | 57,6 (34,5)     | -               |
| Undergone surgery, N                     | 11              | -               |
| Undergone chemotherapy, N                | 9               | -               |
| Undergone radiation therapy, N           | 8               | -               |
| Undergone/undergoing hormone therapy, N  | 8               | -               |
| Undergone/undergoing others treatment, N | 0               | -               |
| Current treatment status, N              |                 |                 |
| Incoming                                 | 0               | -               |
| Ongoing                                  | 0               | -               |
| Ended                                    | 12              | -               |

149

150 **Legend:** SD, standard deviation, N, number; Mets, metabolic equivalent of the task expressed in  
 151 minutes per week;

152 <sup>a</sup> Expressed in years;

153 <sup>b</sup> Expressed in units of kg/m<sup>2</sup>;

154

## 155 **Theme 1: Motivations**

156 Features that have stimulated participant's will to be or become active in everyday life, even after the  
 157 conclusion of oncological treatment, include three main sub-themes: individual, interpersonal and  
 158 organizational factors (Table 3).

159

160 **Table 3.** Motivation and barriers related to running EX identified by cancer survivors compared to  
 161 healthy controls.

| Ecological model (level)                 | Motivations                                                                                                                                                                                                  |                                                                                                                                                                                                | Barriers                                                                                                                                                            |                                                                                                            |
|------------------------------------------|--------------------------------------------------------------------------------------------------------------------------------------------------------------------------------------------------------------|------------------------------------------------------------------------------------------------------------------------------------------------------------------------------------------------|---------------------------------------------------------------------------------------------------------------------------------------------------------------------|------------------------------------------------------------------------------------------------------------|
|                                          | Cancer survivors                                                                                                                                                                                             | Healthy controls                                                                                                                                                                               | Cancer survivors                                                                                                                                                    | Healthy controls                                                                                           |
| Personal factors                         | <ul style="list-style-type: none"> <li>• Prior EX experiences</li> <li>• Enjoyment</li> <li>• Physical and mental benefits</li> <li>• Cancer-related challenge</li> <li>• Hope for other patients</li> </ul> | <ul style="list-style-type: none"> <li>• Prior EX experiences</li> <li>• Enjoyment</li> <li>• Physical and mental benefits</li> <li>• Positive EX results</li> <li>• Ex easy budget</li> </ul> | <ul style="list-style-type: none"> <li>• Lack of time (in progress)</li> <li>• Injury</li> <li>• Cancer-related treatment side effects</li> </ul>                   | <ul style="list-style-type: none"> <li>• Lack of time</li> <li>• EX failure</li> </ul>                     |
| Interpersonal factors                    | <ul style="list-style-type: none"> <li>• EX group support</li> <li>• Family support</li> <li>• Friends support</li> <li>• Physician support</li> </ul>                                                       | <ul style="list-style-type: none"> <li>• EX group support</li> <li>• Family support</li> </ul>                                                                                                 | <ul style="list-style-type: none"> <li>• Trainer not qualified</li> </ul>                                                                                           | <ul style="list-style-type: none"> <li>• Friends</li> </ul>                                                |
| Environmental and organizational factors | <ul style="list-style-type: none"> <li>• Natural environment</li> <li>• Organized training</li> </ul>                                                                                                        | <ul style="list-style-type: none"> <li>• Natural environment</li> </ul>                                                                                                                        | <ul style="list-style-type: none"> <li>• Poor personal security</li> <li>• Untended environment</li> <li>• Air pollution</li> </ul>                                 | <ul style="list-style-type: none"> <li>• Poor personal security</li> <li>• Untended environment</li> </ul> |
| Community and policy factors             |                                                                                                                                                                                                              |                                                                                                                                                                                                | <ul style="list-style-type: none"> <li>• Traditionalist culture</li> <li>• EX only for athletes and body image</li> <li>• Incorrect information delivery</li> </ul> | <ul style="list-style-type: none"> <li>• Run as second-class sport</li> </ul>                              |

162

163 **Individual factors**

164 Different aspects connected with running were common in both groups, as enjoyment, previous  
165 experience, as well as mental and physical benefits of exercising. Some women experienced a true  
166 well-being during their running workout, as reported by this woman: *“I like running, I like the emotion  
167 of moving with my own legs in the environment, and the fatigue I feel is pleasant because it means that  
168 by this kind of practice I am moving towards my goal.”* (Giovanna, OG). Other women perceived their  
169 workouts as a time of their everyday life where they enjoy themselves, as reported by this woman:  
170 *“For me, it is enjoyment and passion. I started practicing sport while I was not young anymore and I  
171 literally fell in love with running.”* (Lara, CG). All women reported that their previous EX experience  
172 represented a positive motivator in building and maintaining their active lifestyle. Although the mental  
173 health benefits from exercise represented a common factor detected in both groups, origins and  
174 consequences were different. In particular, healthy subjects applied these benefits to deal with work,  
175 family or personal stress, as reported by Laura (CG): *“If I’m tired and exhausted at the end of my  
176 working day, I usually go for a run and reach some kind of mental regeneration.”* Differently,  
177 oncological patients benefitted from running experience in terms of better facing the prescribed  
178 treatments, as reported by Elisa (OG): *“I suffered a lot from the psychological point of view after  
179 radiotherapy and chemotherapy, but now I am feeling much better and as far as I understand this is  
180 due to my running workouts.”* Other factors, such as the performance results connected to running, the  
181 fact that it is a cheap and easy to perform activity, were identified as personal motivation by the control  
182 group. In the oncological group, a crucial motivation was specifically related to the disease: In this  
183 regard, all the participants confirm that running means for them a personal challenge after cancer: *“My  
184 main motivation is to show to myself that I can do it, I can do something incredible, like a half  
185 marathon, even after my cancer.”* (Nicoletta, OG). Another important aspect recognized as a potent  
186 stimulus to running is to give hope to other patients: *“I run to give hope to who is beginning the tumor  
187 winding path. Maybe they will see me and say: okay if she won it, I can do it too.”* (Stefania, OG).

188

## 189 **Interpersonal factors**

190 The relationship with others was an important motivator highlighted during the focus group interviews,  
191 in both the experimental and control group. Training with other people was recognized as a vehicle of  
192 sociality able to increase motivation in running. Moreover, for OG, exercising with someone who  
193 shares similar disease-related experiences, helped them to remain motivated and active: *“With these*  
194 *women I immediately found myself very well. We speak the same language because we share the same*  
195 *cancer history.”* (Stefania, OG) and *“Even if I cannot go, I say to myself: no, someone is waiting for*  
196 *me, I cannot skip, I need to go and workout with them.”* (Elisa, OG). Family support is common in both  
197 groups. In the CG perspectives, partner stimulate the participants to train, as Lara (CG) told: *“My*  
198 *husband encouraged me to run. He is a crucial support for me.”*. Regarding cancer survivors, the  
199 relationship with family resulted overall positive, but sometimes controversial. Some of them were  
200 encouraged, as Margherita (OG) remembered: *“My dad is 85 years-old and he rides a bike. He always*  
201 *encourages me to stay physically active”*. By contrary, others had some concerns, as Giovanna (OG)  
202 reported: *“My parents did not want me to run, they told me you will be too much tired, you have to*  
203 *recover”* or Nicoletta (OG) referred: *“My husband recommended me not to exaggerate, because I*  
204 *could get injured like my colleagues did.”* Nevertheless, oncological patients described that friends, as  
205 well as the medical staff, support their choice to begin a running program. Daniela (OG) remembered:  
206 *“When I decided to start a running program, a lot of my friends texted me an encouraging message to*  
207 *continue exercising”* and Tony (OG) recounted: *“My oncologist told me that I had to do this, that after*  
208 *my cancer I had to rebuild my life”*.

209

## 210 **Environmental and organizational factors**

211 For both groups, running in the natural environment is an important supportive factor to continue the  
212 activity. *“Sometimes I go running by the Garda lake, with a wonderful landscape, so it is a very*  
213 *pleasant environment for exercising. I feel less fatigue because I am concentrated on what my eyes see*  
214 *around me”* said Antonella (OG), or *“We live in a beautiful place that gives us the possibility to stay in*  
215 *touch with the nature and I like a lot running in this area”* Federica (CG) remembered. Moreover, OG  
216 recognized the great impact of training with an organized team, which provided them with a running  
217 campus, a trainer to indicate and explain them the workouts they needed to do: *“Have someone who*  
218 *follows you, like an organization, this is very motivating for me”* (Giulia, OG).

219

## 220 **Theme 2: Barriers**

221 The interviews revealed various aspects that could interfere with the running EX. The identified  
222 barriers were grouped into four sub-themes, including: personal, interpersonal, organizational and  
223 community-policy factors (Table 3).

224

### 225 **Individual factors**

226 The personal barriers recognized as obstacles to running were different between the two groups. The  
227 only common aspect was lack of time dedicated to running, although the perspective regarding this  
228 potential barrier was different between OG and CG. For healthy subjects, lack of time emerged as the  
229 principal obstacle that interferes with running: *“Unfortunately I must give priority to the work and*  
230 *when I was preparing for my half marathon and needed to run for two hours, I could run only one hour*  
231 *and a half”* (Erika, CG). Also from cancer survivors’ point of view, lack of time in EX could be a  
232 potential barrier, but most of them explained how cancer disease changed this opinion: *“In a typical*  
233 *day it is difficult to cut out some time for EX because you have to work, prepare the dinner for your*

234 *family, stay with your son because these are the priorities. After my cancer, I said to myself that now I*  
235 *exist! Now I can find my space and my time for EX, I demand it!” (Antonella, OG).*  
236 In OG, a general consent confirmed that injuries and treatment-related side effects represent potential  
237 obstacles for running. In particular, injuries of other training partners were indicated as reasons to  
238 discontinue running, how Elisa (OG) and Nicoletta (OG) reported: *“When I had a knee injury, I was*  
239 *strongly tempted to stop running, to give up the group”* and *“When four out of eight colleagues were*  
240 *injured, I thought of interrupting my training session because I did not want to hurt myself”*. Concerns  
241 about cancer- and treatment-related side effects were indicated as strong factors that may obstacle  
242 running: *“Hormonal therapy causes fatigue and joint pain, therefore sometimes it is very difficult for*  
243 *me to begin any EX”* (Nadia, OG). Mirella (OG) also reported: *“My chemotherapy cycles were very*  
244 *long and hard. The main side effect that I experienced was peripheral neuropathy. Sometimes I had to*  
245 *interrupt running, because I had serious sensibility problem in my foots and I was afraid of hurting*  
246 *myself”*. Finally, CG reported that failing in pre-established running performance was a serious  
247 obstacle to maintain own training: *“When you expect to run for example 10 kilometres with a faster*  
248 *pace and you cannot do it, you lose confidence in yourself and sometimes the temptation to give up is*  
249 *really strong”* (Erika, CG).

250

## 251 **Interpersonal factors**

252 The OG referred that their trainers were not well prepared nor specifically qualified for advising a  
253 patient with oncological disease and this was a major obstacle. *“When I began to run my coach*  
254 *proposed me an overestimated program for my situation. After a month and a half my knees were*  
255 *blocked, I was in pain, I had difficulty to walk, I had to stop for one month and the temptation to*  
256 *interrupt was very strong”* (Antonella, OG). Another participant in the OG expressed concerns

257 regarding the knowledge of some instructors: *“I did not have a good trainer, I never performed a*  
258 *warm-up phase, or exercised to reinforce my muscle, and also from a human point of view the support*  
259 *was completely missing”* (Ilaria, OG).

260

## 261 **Environmental and organizational factors**

262 Poor personal security and uncontrolled environment were interrelated and represented a barrier for  
263 running in both the CG and OG. *“I love running in the nature, but sometimes I meet weird people and I*  
264 *think: this way is not secure for running because I should run without listening to music in order to see*  
265 *if the person that stopped is following me”* recounted Lara during an interview in the control group.  
266 Also, Margherita (OG) told: *“I used to run on the bicycle lane and I always carried pepper spray with*  
267 *me because the environment was not controlled and I always had this feeling that someone was behind*  
268 *me, I did not feel comfortable”*. However, this feeling of insecurity is magnified by poor maintenance  
269 of natural environment; in the OG: *“Some areas are poorly managed, there is tall grass that nobody*  
270 *cuts, the plants are not pruned and grow everywhere and consequently I'm afraid to run in those*  
271 *places”* (Rossella, OG). In addition, another problem for OG was air pollution: *“Sometimes I decide to*  
272 *postpone my training due to poor air quality; I do not want to breathe toxic air.”* (Ilaria OG). Another  
273 woman reported the difficulty to run in some areas because of air pollution: *“In some places, smog is*  
274 *very high and I have to admit that it is really difficult to go out for a run.”* (Margherita, OG).

275

## 276 **Community-policy factors**

277 Even if both groups recognized that the sport bodies organise several running manifestations, they agreed  
278 on the fact that the actual Italian policy situation was not favourable on promoting running. As Paola  
279 (CG) said: *“We live in a country where the main sport is football, the others are considered second class*

280 *sports and, for this reason, are penalized*". Furthermore, the OG highlighted how the current  
281 traditionalist culture hindered the practice of PA in general: "*We live in a traditionalist culture, in which*  
282 *we teach our sons to go to school, to work, to have a family. These are the priorities.*" (Antonella, OG).  
283 Moreover, marketing was reported as a negative factor that blocks the correct and healthy promotion of  
284 running. For cancer survivors, advertising promote a wrong image and incorrect information. In fact, it  
285 usually appears that running EX is only adequate for athletes or for physically active subjects, and it is  
286 always related to body image. In this regard, Rossella (OG) and Nadia (OG) remembered: "*The current*  
287 *advertising and culture teach you to follow a woman model: lean, made up, that does not sweat; this is*  
288 *very disheartening for me.*" or "*Many information is incorrect and confounding; according to certain*  
289 *advertising you should train yourself to be cool and to have a beautiful body, not for health or for*  
290 *preventing or controlling chronic conditions.*"

291

## 292 **Discussion**

293 To the best of our knowledge, this research represents the first qualitative investigation exploring  
294 motivations and barriers about running, as exercise training, in a group of female cancer survivors and  
295 compared them with matched healthy controls. We found several factors that stimulate the approach  
296 and adherence to running and others that limit them.

297 Regarding running motivations, several points were common in both groups, such as enjoyment,  
298 possibility to perform this type of EX in a natural environment, social support given by teammates and  
299 attitude towards EX. These results are in line with previous data (20). *McIntosh et al.* for example  
300 identified physical and psychological benefits together with social support as factors that stimulated  
301 patients who have had a cancer to maintain their walking activity (17). Nevertheless, from cancer  
302 survivors' perspective, other strong running motivations, related to their health history, were identified.



303 Running performance was a challenge connected with their disease and a sort of demonstration they  
304 could overcome cancer, giving also hope to other cancer patients. Moreover, the focus group  
305 highlighted that patients who have had an oncological disease obtained more support from their family,  
306 friends, physician and workout teammates compared to healthy controls. This result is supported by  
307 *Husebø et al.*, who identified social support as a crucial component in influencing physical EX in  
308 women affected by breast cancer (21). Regarding the environmental and organizational level, other  
309 motivations stimulated patients to maintain their running program, such as taking part in an organized  
310 training program and performing this activity in a natural environment. Doing EX outside is a common  
311 preference found in several other studies, in different cancer populations, while *Blaney et al.* reported  
312 that participating in an EX program, organized and supervised by an EX specialist was a strong  
313 motivator that seemed to offer assurance to survivors (22).

314 Focusing on barriers toward running, some environmental and organizational factors were similar  
315 between the oncological group and healthy subjects, such as poor personal security and untended  
316 environment. Another study has emphasized these obstacles mentioning that “safety issues” were an  
317 impediment to patients affected by cancer walking activity (23). In addition, they expressed many  
318 barriers related to their cancer journey (18, 22). For example, cancer-related treatment side effects, such  
319 as fatigue, joint pain or peripheral neuropathy were identified as serious impediments significantly  
320 interfering with the maintenance of running EX. Moreover, physical injuries, inexperienced trainer, air  
321 pollution and the public scarce attractiveness of running training have emerged as issues that can inhibit  
322 the adherence to a running program. These barriers can be related also to the past disease history of  
323 these subjects. Indeed, a cancer diagnosis and its related treatments carry several physical and  
324 psychological impairments that alter the subject’s perspectives, e.g. changes in body composition and  
325 body image, physical deconditioning. Cancer survivors might feel not capable of performing EX, and  
326 specifically running, consequently, they are afraid to undergo injuries and want, for this reason,

327 assurance regarding the trainer' professionalism (24). Moreover, after diagnosis, they usually search for  
328 additional information about their lifestyle (e.g. nutrition, smoking, alcohol consumption, PA) from  
329 several sources. Without adequate competence to correctly evaluate the quality of found information,  
330 there is the concrete risk of finding fake news leading to wrong and risky habits or that can induce  
331 excessive attention to those environmental factors potentially harmful as air pollution.

332 One last element seems significant, even if ambivalent. The possibility of reliving the positive emotions  
333 experienced in previous training experiences are indicated as significant motivations by the OG. This  
334 element further supports the promotion of widespread exercise and training experiences in the whole  
335 population because its lack, decreases the possibility of reaction in case of illness.

336 Our study has some limitations, including the low response rate especially in the control group, even if  
337 the saturation principle was achieved. The oncological group was affected by different cancer types and  
338 considering the peculiarity of the physical EX evaluated (endurance running), the results are not widely  
339 generalizable to other activities. Nonetheless, precisely because these conditions represent a real-world  
340 situation, we believe that it is interesting to understand factors that induced these subjects to approach  
341 and adhere to running EX.

342 In conclusion, the current literature shows the strong importance of a constant PA, such as endurance  
343 running, even after a cancer diagnosis in order to reduce mortality and recurrence risk. Exploring the  
344 factors that limited and favoured the promotion of an active lifestyle is extremely important to design  
345 specific interventions. Our study investigated, using an ecological approach, barriers and motivations  
346 towards endurance running in women affected by cancer and compared them with matched healthy  
347 subjects. We found that OG had many motivations originating by personal and interpersonal levels.  
348 Furthermore, they interfaced with several obstacles, present into all four levels of the ecological model.  
349 Among them, the cancer experience appeared significantly important and influenced both motivators

350 and barriers. Developing a running program that considers all these aspects, may increase its success in  
351 terms of both adherence and compliance in this kind of patients (Fig 1).

352

353

## 354 **Acknowledgements**

355 We thank all the participants that took place in this study.

## 356 **References**

- 357 1. Aiom A. I numeri nel cancro in Italia 2018.
- 358 2. Campbell KL, Winters-Stone KM, Wiskemann J, May AM, Schwartz AL, Courneya KS, et al.  
359 Exercise Guidelines for Cancer Survivors: Consensus Statement from International Multidisciplinary  
360 Roundtable. *Med Sci Sports Exerc.* 2019;51(11):2375-90.
- 361 3. Cormie P, Zopf EM, Zhang X, Schmitz KH. The Impact of Exercise on Cancer Mortality,  
362 Recurrence, and Treatment-Related Adverse Effects. *Epidemiol Rev.* 2017;39(1):71-92.
- 363 4. Rogers LQ, Courneya KS, Anton PM, Verhulst S, Vicari SK, Robbs RS, et al. Effects of a  
364 multicomponent physical activity behavior change intervention on fatigue, anxiety, and depressive  
365 symptomatology in breast cancer survivors: randomized trial. *Psychooncology.* 2017;26(11):1901-6.
- 366 5. Chen HM, Tsai CM, Wu YC, Lin KC, Lin CC. Effect of walking on circadian rhythms and  
367 sleep quality of patients with lung cancer: a randomised controlled trial. *Br J Cancer.*  
368 2016;115(11):1304-12.
- 369 6. Stene GB, Helbostad JL, Balstad TR, Riphagen, II, Kaasa S, Oldervoll LM. Effect of physical  
370 exercise on muscle mass and strength in cancer patients during treatment--a systematic review. *Crit*  
371 *Rev Oncol Hematol.* 2013;88(3):573-93.
- 372 7. Scott JM, Zabor EC, Schwitzer E, Koelwyn GJ, Adams SC, Nilsen TS, et al. Efficacy of  
373 Exercise Therapy on Cardiorespiratory Fitness in Patients With Cancer: A Systematic Review and  
374 Meta-Analysis. *J Clin Oncol.* 2018;36(22):2297-305.
- 375 8. Lee DC, Brellenthin AG, Thompson PD, Sui X, Lee IM, Lavie CJ. Running as a Key Lifestyle  
376 Medicine for Longevity. *Prog Cardiovasc Dis.* 2017;60(1):45-55.

- 377 9. Zach S, Xia Y, Zeev A, Arnon M, Choresh N, Tenenbaum G. Motivation dimensions for  
378 running a marathon: A new model emerging from the Motivation of Marathon Scale (MOMS). *J Sport*  
379 *Health Sci.* 2017;6(3):302-10.
- 380 10. van Dyck D, Cardon G, de Bourdeaudhuij I, de Ridder L, Willem A. Who Participates in  
381 Running Events? Socio-Demographic Characteristics, Psychosocial Factors and Barriers as Correlates  
382 of Non-Participation-A Pilot Study in Belgium. *Int J Environ Res Public Health.* 2017;14(11).
- 383 11. McLeroy KR, Bibeau D, Steckler A, Glanz K. An ecological perspective on health promotion  
384 programs. *Health Educ Q.* 1988;15(4):351-77.
- 385 12. King KM, Gonzalez GB. Increasing Physical Activity Using An Ecological Model. *ACSM's*  
386 *Health & Fitness Journal.* 2018;22(4):29-32.
- 387 13. O'Brien BC, Harris IB, Beckman TJ, Reed DA, Cook DA. Standards for reporting qualitative  
388 research: a synthesis of recommendations. *Acad Med.* 2014;89(9):1245-51.
- 389 14. Tong A, Sainsbury P, Craig J. Consolidated criteria for reporting qualitative research  
390 (COREQ): a 32-item checklist for interviews and focus groups. *Int J Qual Health Care.*  
391 2007;19(6):349-57.
- 392 15. Danese E, Salvagno GL, Tarperi C, Negrini D, Montagnana M, Festa L, et al. Middle-distance  
393 running acutely influences the concentration and composition of serum bile acids: Potential  
394 implications for cancer risk? *Oncotarget.* 2017;8(32):52775-82.
- 395 16. Lippi G, Schena F. Run for Science (R4S): the history of a successful project of precision and  
396 laboratory medicine in sport and exercise. *Journal of Laboratory and Precision Medicine.* 2017;2(4).
- 397 17. McIntosh M, Opozda M, Galvao DA, Chambers SK, Short CE. Identifying the exercise-based  
398 support needs and exercise programme preferences among men with prostate cancer during active  
399 surveillance: A qualitative study. *Eur J Oncol Nurs.* 2019;41:135-42.

- 400 18. Henriksson A, Arving C, Johansson B, Igelstrom H, Nordin K. Perceived barriers to and  
401 facilitators of being physically active during adjuvant cancer treatment. *Patient Educ Couns*.  
402 2016;99(7):1220-6.
- 403 19. Erlingsson C, Brysiewicz P. A hands-on guide to doing content analysis. *Afr J Emerg Med*.  
404 2017;7(3):93-9.
- 405 20. Hardcastle SJ, Maxwell-Smith C, Zeps N, Platell C, O'Connor M, Hagger MS. A qualitative  
406 study exploring health perceptions and factors influencing participation in health behaviors in  
407 colorectal cancer survivors. *Psychooncology*. 2017;26(2):199-205.
- 408 21. Husebo AM, Karlsen B, Allan H, Soreide JA, Bru E. Factors perceived to influence exercise  
409 adherence in women with breast cancer participating in an exercise programme during adjuvant  
410 chemotherapy: a focus group study. *J Clin Nurs*. 2015;24(3-4):500-10.
- 411 22. Blaney J, Lowe-Strong A, Rankin J, Campbell A, Allen J, Gracey J. The cancer rehabilitation  
412 journey: barriers to and facilitators of exercise among patients with cancer-related fatigue. *Phys Ther*.  
413 2010;90(8):1135-47.
- 414 23. Frensham LJ, Parfitt G, Stanley R, Dollman J. Perceived Facilitators and Barriers in Response  
415 to a Walking Intervention in Rural Cancer Survivors: A Qualitative Exploration. *Int J Environ Res*  
416 *Public Health*. 2018;15(12).
- 417 24. Hardcastle SJ, Maxwell-Smith C, Kamarova S, Lamb S, Millar L, Cohen PA. Factors  
418 influencing non-participation in an exercise program and attitudes towards physical activity amongst  
419 cancer survivors. *Support Care Cancer*. 2018;26(4):1289-95.

420

421

422

423 **Figure Legend**

424 Fig1. Strategies to increase adherence and compliance in a running program

425



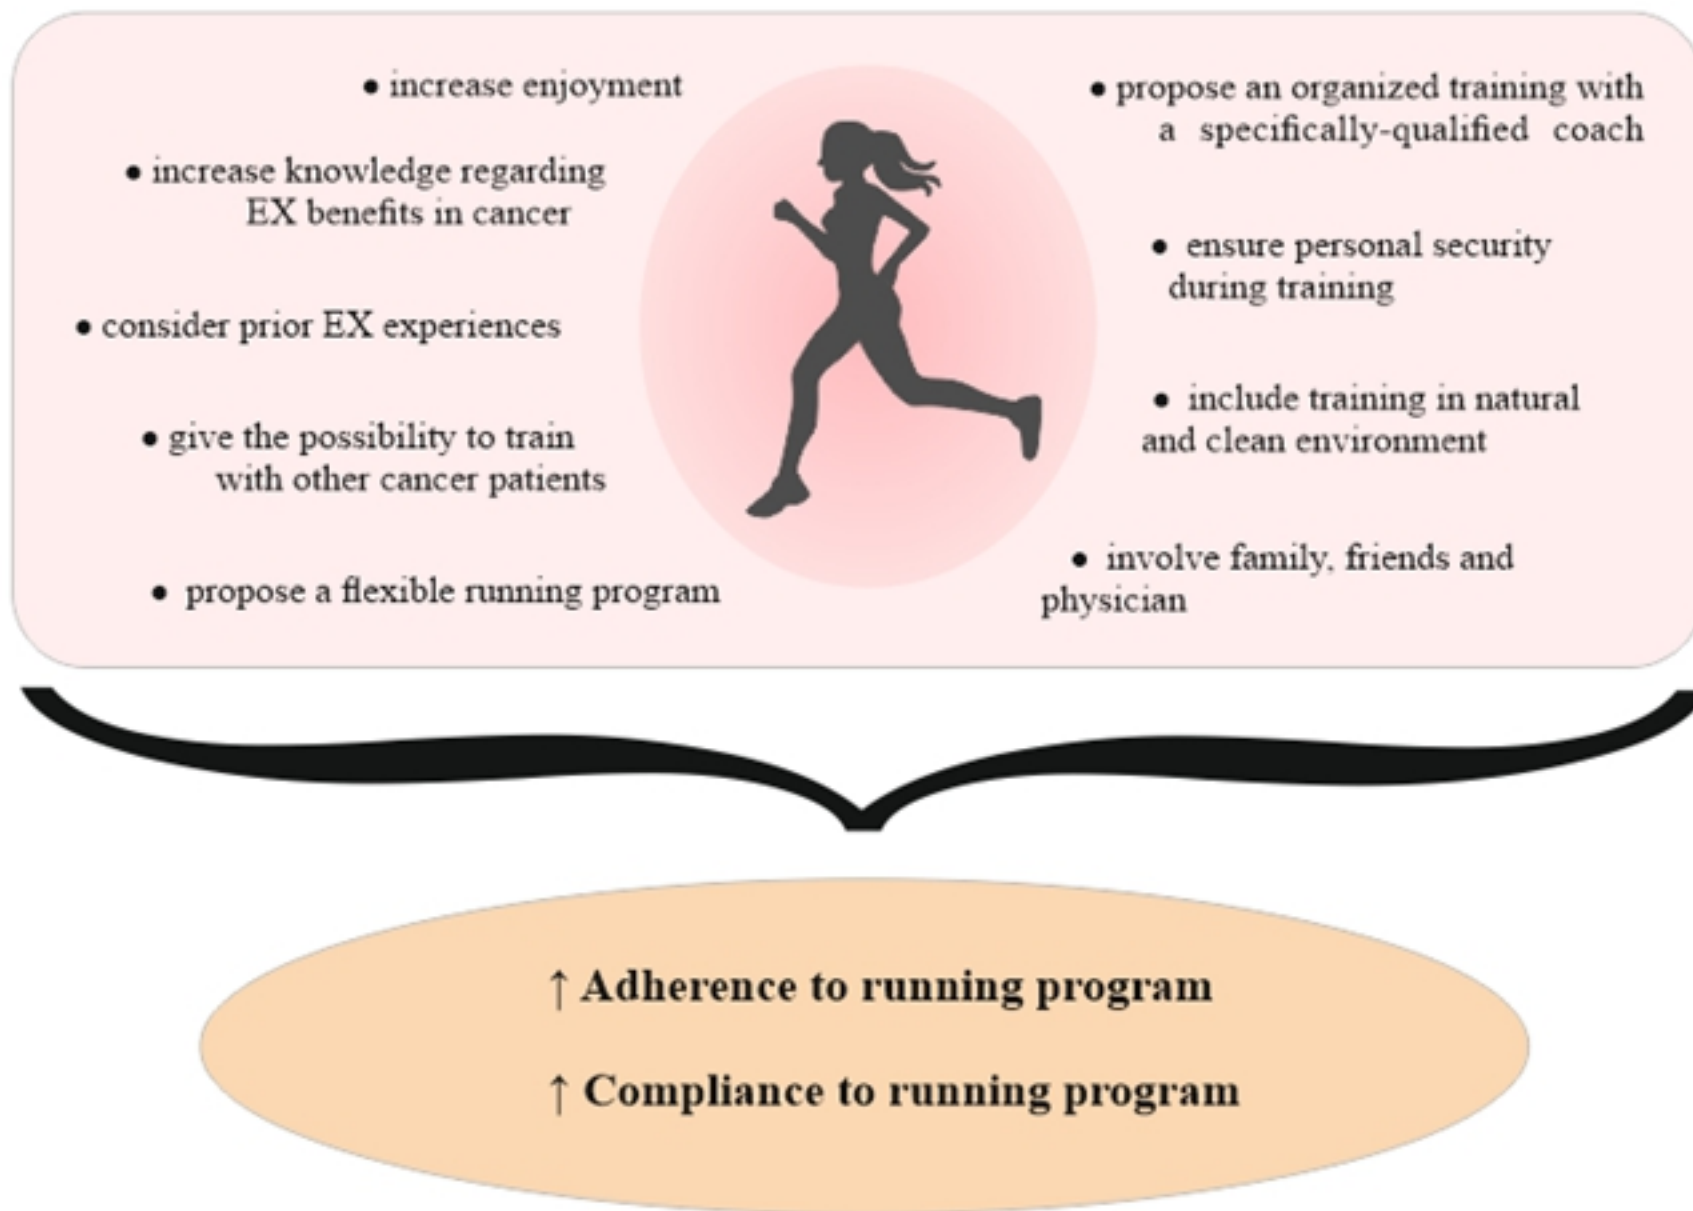

Figure 1
